# Supplementary material
Source: publisher figshare collection journal article supplement (https://acs.figshare.com/ndownloader/files/4005604)
Supplement: Supplementary file 1 [file 4005604]

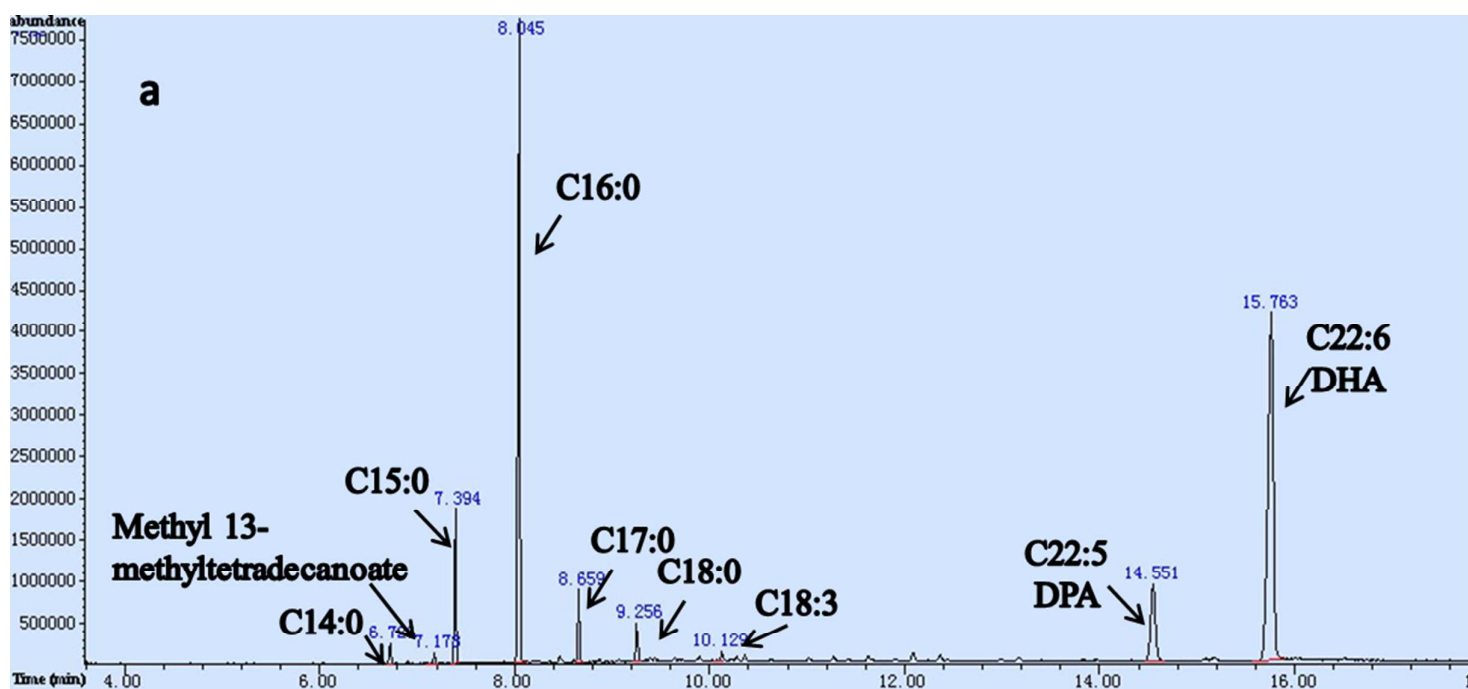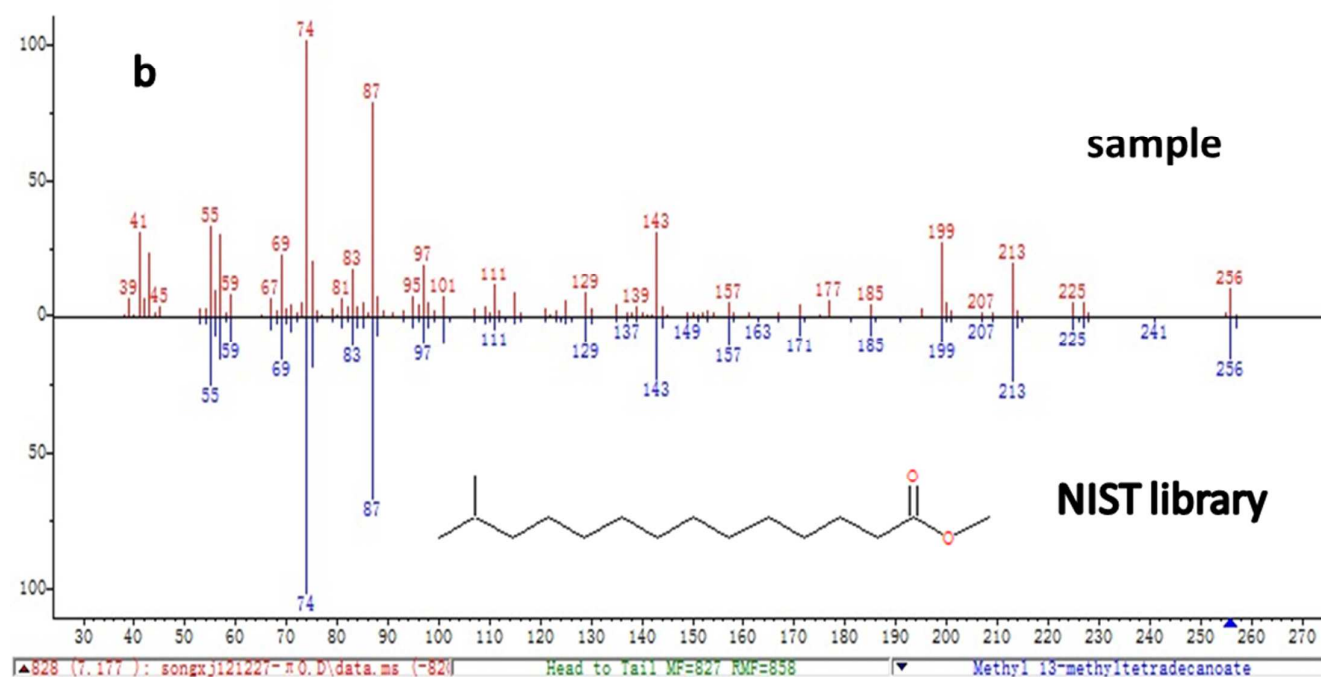

Supplementary Fig. S1 The identification of the branch-chain fatty acid methyl 13-methyltetradecanoate. (a, the fatty acid composition analysis of isovaleric acid treatment by GC-MS; b, The search result of NIST Library )
